# Supplementary material
Source: PubMed Central journal article supplement (PMC5338391)
Supplement: pnas.1620577114.sapp.pdf [file pnas.1620577114.sapp.pdf]

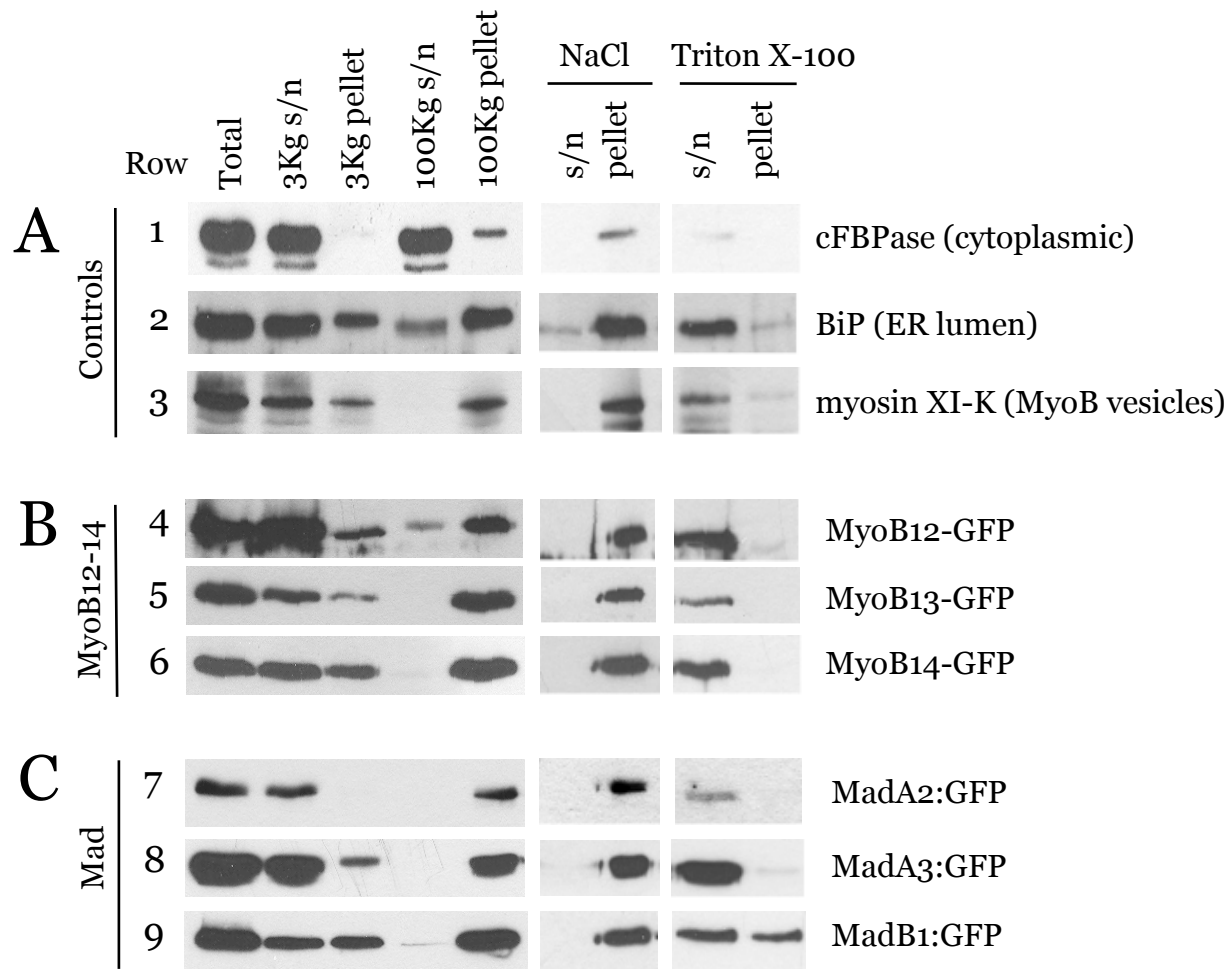

**SI Fig. S1.** Subcellular fractionation of leaf extracts from Columbia plants (A), transgenic plants expressing GFP-tagged MyoB12-14 (B) or GFP-tagged Mad proteins (C) as indicated. The 3,000 g (3Kg) and 100,000 g (100Kg) supernatants (s/n) and pellets were analyzed using immunoblotting and antibodies specific to cytoplasmic protein fructose-1,6 bisphosphatase (cFBPase) (row 1), to ER-luminal protein BiP (row 2), to myosin XI-K that associates with MyoB vesicles (row 3) or to GFP (rows 4-9). Treatment of 100Kg pellets shown in the left column with either 1M NaCl or 1% Triton X-100, followed by centrifugation at 100Kg is shown in two right-most columns, respectively.

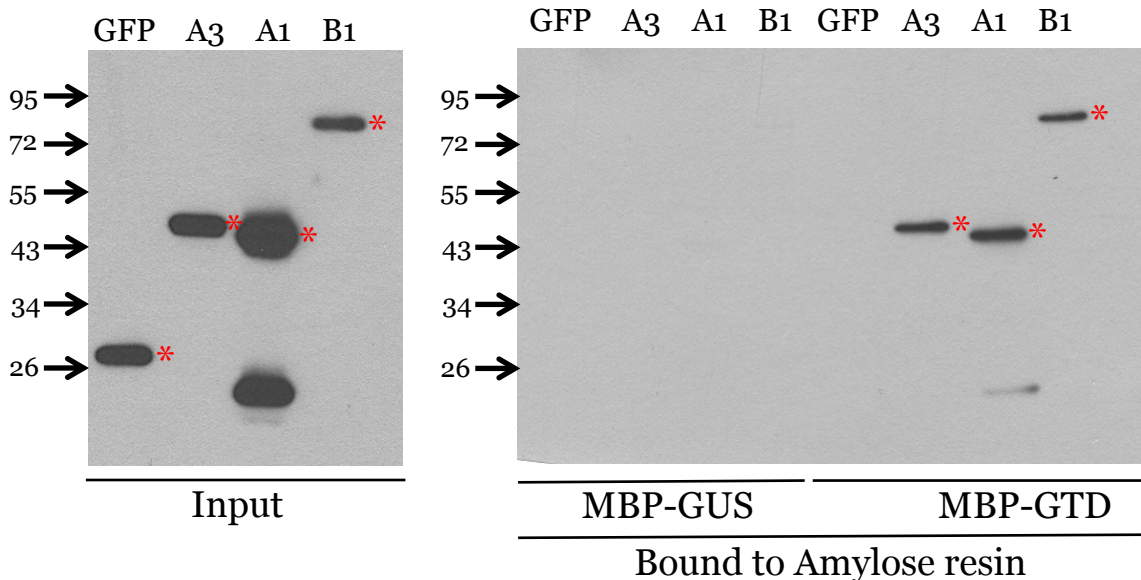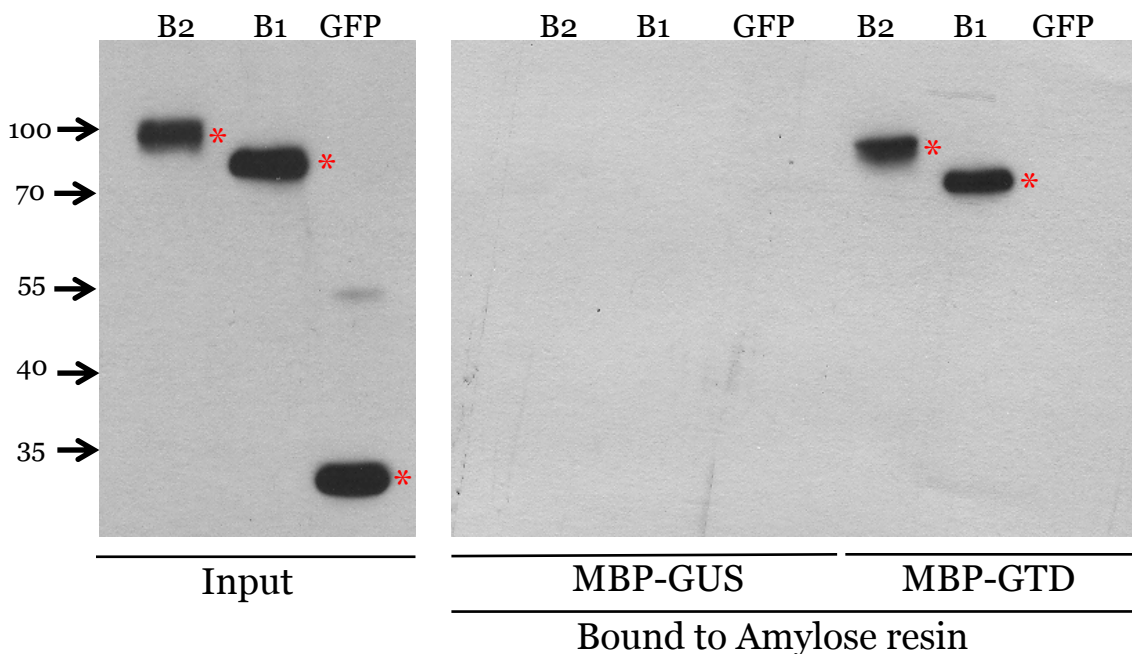

**SI Fig. S2.** Pull-down assay showing specific binding of MadA1:FLAG (A1), MadA3:FLAG (A3), MadB1:FLAG (B1) and MadB2:FLAG (B2; At1g62390) to immobilized XI-K-GTD (MBP-GTD) but not to immobilized GUS (MBP-GUS; negative control). Note that GFP:FLAG does not bind to either MBP-GUS, nor to MBP-GTD providing additional control of binding specificity. The immunoblot analysis and FLAG-specific antibody were used for band visualization. The arrows denote positions of protein markers with molecular mass in kDa. Red asterisks mark full-size protein bands; bands of lower molecular mass probably correspond to degradation products.

**SI Table S1.** Y2H screens of the Normalized Arabidopsis Universal Library using MyoB14 (AT4G13160) as bait

| Hits | Match ID  | Protein Description                           |
|------|-----------|-----------------------------------------------|
| 3    | AT4G36980 | Molecular function unknown                    |
| 3    | AT3G61790 | Protein with RING/U-box and TRAF-like domains |
| 3    | AT2G41980 | Protein with RING/U-box and TRAF-like domains |
| 2    | AT5G20490 | Myosin XI-K                                   |
| 1    | AT1G17580 | Myosin XI-1                                   |
| 1    | AT1G22640 | Symbols: ATMYB3, MYB3. Myb domain protein 3   |
| 2    | AT5G51850 | Unknown protein (TAIR:AT5G62170.1)            |
| 1    | AT1G11125 | Unknown protein (TAIR:AT1G61170.1)            |

## SI Movie Legends

All movies were filmed at 5 frames/sec; bar corresponds to 2  $\mu\text{m}$ .

**SI Movie S1.** Linear transport of the MyoB12-GFP-tagged endomembrane vesicles.

**SI Movie S2.** Linear transport of the MyoB13-GFP-tagged endomembrane vesicles.

**SI Movie S3.** Linear transport of the MyoB14-GFP-tagged endomembrane vesicles.  
Note larger size and sparser appearance of these vesicles compared to MyoB12-GFP and MyoB13-GFP.

**SI Movie S4.** Apparent export of the GFP-MadA1-tagged material out of nucleus.

**SI Movie S5.** The endomembrane vesicles associated with MadA2-GFP partition between motile linear arrays and diffuse cytosolic compartment.

**SI Movie S6.** The endomembrane vesicles associated with MadA3-GFP partition between motile linear arrays and diffuse cytosolic compartment.

**SI Movie S7.** The endomembrane vesicles associated with MadB1-GFP partition between motile linear arrays and diffuse cytosolic compartment.

## SI Appendix, Dataset S3: The phylogenetic tree for plant myosins

The maximum-likelihood phylogenetic tree of the myosin family was built using the FastTree program as described in the Materials and Methods section. The multiple alignment used for tree reconstruction contains 512 sequences and 693 informative positions (alignment can be provided by request). The topology of this myosin tree is consistent with myosin classification published before (see ref. Peremyslov VV, et al. 2011 in the main text). *Amborella trichopoda* (see Amt\_XXXXXX IDs), a basal member of the flowering plant lineage Magnoliophyta, possesses a single myosin of each subfamily.

The tree (below) is provided in Newick format, could be open in MEGA or in any other tree visualization software. To open the file copy the text below the dotted line to a text file with “tre” extension, MEGA (or other tree visualization software) should open the file automatically. The original sequence data in fasta format with identifiers corresponding to this tree is provided at the following FTP site in the file **Myosins.fa** and the species abbreviations are explained in the file **Species abbreviation**:

[ftp://ftp.ncbi.nlm.nih.gov/pub/wolf/\\_suppl/myosins/](ftp://ftp.ncbi.nlm.nih.gov/pub/wolf/_suppl/myosins/)

-----

```
((Cus_A0A0A0LZH6:0.04544,(Pt_B9HDW1:0.02782,((Eg_A0A059CU90:0.0,Eg_A0A059CUJ1:0.0,Eg_A0A059CV38:0.0):0.04470,Rc_B9RK43:0.01910)0.510:0.00986)0.716:0.01021)0.489:0.00577,((Mt_A0A072US24:0.02918,(Gm_I1LY26:0.00523,Gm_I1MSD7:0.00311)0.944:0.01125)0.985:0.02085,(((Bn_A0A078IPF9:0.00279,Br_M4CQS0:0.00014)0.874:0.00308,(Bn_A0A078C2H9:0.00014,Bo_A0A0D3B239:0.00279)0.900:0.00399)0.844:0.00465,(((Bn_A0A078I4Z3:0.0,Bn_A0A078JMJ3:0.0,Br_M4DUB2:0.0):0.00153,Bo_A0A0D3AK59:0.00127)0.977:0.01163,(Al_D7M015:0.00314,At5g20490:0.00406)0.999:0.02017)0.519:0.00438)1.000:0.07200)0.575:0.00558,((Nb_116047947|gb|ABJ53199.1|:0.01279,(Sl_K4CDY9:0.00013,(St_M1BVP8:0.00014,St_M1BVP9:0.00014)0.945:0.00418)0.979:0.01468)0.999:0.02827,(((Amt_W1PB60:0.04430,((((Nm_JV741420.1:0.07012,(Nm_GBST01077482.1:0.00259,Nm_GBST01077483.1:0.01259)1.000:0.13738)1.000:0.17925,((Nm_JV743333.1:0.06610,(Nm_GBST01091531.1:0.00014,(Nm_GBST01091532.1:0.00014,(Nm_GBST01091534.1:0.00014,Nm_GBST01091535.1:0.00014)1.000:0.00015)0.926:0.00431)1.000:0.11799)1.000:0.12901,(Cc_BAA87057.1:0.14960,(Nm_GBST01091533.1:0.05934,Nm_JV743336.1:0.11395)0.851:0.03130)0.970:0.03272)0.474:0.04371)1.000:0.15328,(((Ol_A4RZ59:0.07069,Ot_A0A090M2H7:0.13927)1.000:0.30070,(Mpu_C1N1P7:0.13238,Ms_C1DYW5:0.11639)0.998:0.10055)1.000:0.14993,((((Mc_226517133|gb|ACO63127.1|:0.0,Ms_C1E4J1:0.0):0.49618,Mpu_C1MPX6:0.33779)0.999:0.19437,((((Amt_W1P702:0.08981,((Sb_C5XBK2:0.08346,Zm_A0A096QRX5:0.06015)1.000:0.07604,((Obr_J3MM14:0.02584,(Op_A0A0E0LM79:0.03964,(Osj_Q6UAL5:0.00139,(Osi_B8B7G2:0.00146,(Or_A0A0E0Q9W:0.00014,(Ogl_A0A0E0ALF2:0.00307,(Oba_A0A0D3GSF4:0.00014,Og_I1QBM3:0.01247)0.922:0.00774)0.000:0.00015)0.802:0.00377)0.890:0.00455)0.993:0.01677)0.854:0.00826)1.000:0.05055,(Bradi1g24747:0.03172,(((Ta_W5B3W2:0.00198,Tu_M8A728:0.03414)0.949:0.00885,Ta_W5C8A3:0.00570)0.388:0.00340,Ta_W5BIP7:0.01052)1.000:0.03318)0.999:0.04724)0.923:0.02490)1.000:0.22555,((((Bn_A0A078GUL6:0.01640,(Bn_A0A078IS10:0.01371,(Bo_A0A0D3AM92:0.00438,Br_M4E1Q8:0.01547)0.865:0.01087)0.684:0.00907)0.791:0.01362,(Al_D7MU77:0.02246,((Bn_A0A078FN47:0.01122,Br_M4CFL6:0.01257)0.722:0.00488,(Bn_A0A078FZ44:0.00014,Bo_A0A0D3EAY7:0.01225)0.977:0.01498)0.999:0.02890)0.467:0.00772)0.998:0.05700,(Al_D7MEG3:0.08119,Bo_A0A0D3A6X6:0.08121)1.000:0.07856)1.000:0.13170,(Rc_B9SID8:0.11462,(Pt_B9I012:0.08219,Pt_U5GW01:0.03789)1.000:0.10190)0.979:0.03580)0.868:0.02640,((Mt_G7IR58:0.09867,(Gm_I1M3E0:0.02188,Gm_K7LWB7:0.01819)0.993:0.03348)0.949:0.02746,((Gm_I1KE52:0.05313,Gm_I1LSZ6:0.03860)1.000:0.09380,Mt_A0A072TQA3:0.18011)0.984:0.04781)1.000
```

:0.06692)0.945:0.02601,((Eg\_A0A059BUY3:0.16866,Cus\_A0A0A0LCZ6:0.26704)0.723:0.02241,((Vv\_225461317:0.01251,Vv\_302143081:0.00336)1.000:0.15215,((Nb\_116047953|gb|ABJ53202.1|:0.08656,Sl\_K4CH42:0.10220)1.000:0.08398,(Nb\_116047951|gb|ABJ53201.1|:0.06752,Sl\_K4CXL3:0.11060)1.000:0.10703)1.000:0.11693)0.232:0.02277)0.547:0.01685)0.995:0.06377)0.564:0.02337)0.121:0.02783,(Amt\_W1PNJ9:0.09637,(((Sb\_C5WXH3:0.01250,(Zm\_A0A096SBD4:0.02072,Zm\_A0A096RU17:0.01557)0.364:0.00154)0.971:0.01918,((Obr\_J3N3L0:0.00918,(((Osj\_Q0IWT8:0.00014,Osj\_Q8W5J0:0.00014)0.661:0.00014,(((Ogl\_A0A0E0BC03:0.0,Ogl\_A0A0E0BC04:0.0):0.00014,(Oba\_A0A0D3HEZ2:0.00014,Oba\_A0A0D3HEZ5:0.00756)0.861:0.00370)0.825:0.00370,Or\_A0A0E0RON8:0.00015)0.430:0.00374)0.820:0.00146,(Osi\_B8BHL2:0.00146,(Oba\_A0A0D3HEZ3:0.00012,Oba\_A0A0D3HEZ4:0.00296)0.849:0.00147)0.000:0.00015)0.855:0.00295,Op\_A0A0E0M919:0.05876)0.854:0.00297)0.986:0.01522,(Bradi3g29440:0.01541,(Tu\_M8A6Q5:0.02032,(Ta\_W4ZNA3:0.00015,Ta\_W5AHZ4:0.01046)0.764:0.00603)0.970:0.02168)1.000:0.03144)0.613:0.00604)1.000:0.10633,(((Al\_D7KFY8:0.01127,(((Bo\_A0A0D3CFZ3:0.00014,(Bn\_A0A078GVY3:0.00014,Br\_M4FEW9:0.00147)0.958:0.00441)0.930:0.00015,Bn\_A0A078IVC2:0.00597)1.000:0.04698,(Bn\_A0A078GBN3:0.00294,((Bn\_A0A078HXQ8:0.0,Bo\_A0A0D3CPQ4:0.0):0.00146,Br\_M4DQQ1:0.00014)0.857:0.00292)0.951:0.01090)0.982:0.01925)0.943:0.01452,(((Bo\_A0A0D3BCA5:0.00989,Bn\_A0A078HGT6:0.03941)0.262:0.00756,(Bn\_A0A078CZJ3:0.01103,Br\_M4CC38:0.01184)0.582:0.00547)0.576:0.00499,((Bn\_A0A078GIZ4:0.03033,Br\_M4F434:0.00304)0.761:0.00138,(Bn\_A0A078GGV9:0.0,Bo\_A0A0D3CI85:0.0):0.00301)0.968:0.00920)0.920:0.00728,Al\_D7LAU6:0.01908)0.965:0.01767)1.000:0.06734,((Nb\_116047949|gb|ABJ53200.1|:0.02262,Sl\_K4B4U1:0.01800)1.000:0.06320,(((Cus\_A0A0A0KT29:0.07948,Eg\_A0A059BFS7:0.06386)0.993:0.03107,(Rc\_B9SCN9:0.03960,(Pt\_B9H5P2:0.02926,Pt\_B9HGE4:0.01012)1.000:0.03163)0.939:0.01207)0.150:0.00440,(Vv\_147844473:0.01686,(Vv\_225463689:0.0,Vv\_297742765:0.0,Vv\_731406075:0.0,Vv\_731406077:0.0,Vv\_731406080:0.0):0.00014)1.000:0.04543)0.381:0.00546,((Mt\_A0A072VGP3:0.04300,(Gm\_I1NCW2:0.01161,Gm\_K7LGM7:0.03478)0.871:0.01110)0.972:0.01625,(Mt\_G7IEA4:0.04552,(Gm\_I1LF91:0.00568,Gm\_I1NF52:0.00537)1.000:0.02721)0.952:0.01270)1.000:0.04347)0.013:0.00244)0.855:0.01081)0.994:0.04255)0.990:0.04343)0.972:0.04166)1.000:0.19305,(((Sphfalx0008s0080:0.05250,Sphfalx0196s0021:0.04631)0.989:0.04682,((Pp\_A9T6S0:0.07527,(Pp\_A9RMV3:0.06669,Pp\_A9TGX9:0.07403)0.974:0.03586)0.993:0.04804,(Pp\_A9SQP5:0.08098,Pp\_A9TBI5:0.06212)1.000:0.13295)0.928:0.03978)0.999:0.09197,Mp\_669633197|dbj|BAL60532.2|:0.11772)0.781:0.04483)0.000:0.02568,((Sm\_D8RWM0:0.00681,Sm\_D8S643:0.00212)1.000:0.21688,(Sm\_D8RP15:0.01164,Sm\_D8TCN9:0.00542)1.000:0.41791)0.203:0.07764)1.000:0.32149,((Cr\_A8J510:0.08180,Gp\_1004137380|gb|KXZ45406.1|:0.09438)1.000:0.50604,(Cs\_I0Z785:0.35208,Cv\_E1ZPP4:0.40677)0.582:0.06012)0.999:0.18630)0.440:0.05922)1.000:0.34741,((Ap\_2051981|gb|AAB53061.1|:0.33799,Ap\_2051983|gb|AAB53062.1|:0.31421)1.000:0.24637,(Cs\_I0YWMM6:0.23353,(Ap\_A0A087SIY0:0.35642,Cv\_E1ZK17:0.21707)0.968:0.08217)0.940:0.07513)1.000:0.22872)0.994:0.12864,((Cs\_I0Z4C9:0.18813,Cv\_E1Z751:0.18054)0.965:0.05679,((Cr\_A8J8K0:0.03470,Vc\_D8U7B0:0.06486)1.000:0.27385,(Cr\_A8HRC2:0.21746,Vc\_D8TMB6:0.17049)1.000:0.43669)0.071:0.05526)0.998:0.10416)0.910:0.04454)0.999:0.11638,Kf\_971520635|dbj|GAQ77622.1|:0.18723)0.948:0.05766)0.474:0.05342,((Ac\_56603655|dbj|BAD80748.1|:0.09482,(((Sm\_D8RV10:0.00133,Sm\_D8T031:0.00149)1.000:0.15768,(Sm\_D8R675:0.00169,Sm\_D8SGE3:0.00113)0.999:0.05475)0.988:0.04168,(Mp\_375058311|dbj|BAL60533.1|:0.07916,((Sphfalx0344s00011:0.00014,(Sphfalx0344s00012:0.00014,Sphfalx0344s00013:0.00014)1.000:0.02700)1.000:0.07884,(Pp\_A9SX56:0.49180,(Pp\_A9SCX3:0.01995,Pp\_A9SX53:0.01321)0.931:0.03339)0.988:0.05165)0.926:0.03644)0.882:0.02105)0.974:0.02628)0.877:0.01865,((Op\_A0A0E0M7C0:0.01159,((Osi\_B8BGN7:0.00309,((Osj\_Q8LSS8:0.00014,((Or\_A0A0E0QYN1:0.0,Or\_A0A0E0QYN2:0.0,Or\_A0A0E0QYN6:0.0):0.00014,(Or\_A0A0E0QYN3:0.0,Or\_A0A0E0QYN5:0.0):0.00014)0.984:0.00014)0.861:0.00148,(Osj\_Q8LM72:0.00014,Or\_A0A0E0QYN4:0.00014)0.000:0.00016)0.768:0.0

0151)0.842:0.00153,((Ogl\_A0A0E0BA32:0.0,Ogl\_A0A0E0BA33:0.0):0.00016,Oba\_A0A0D3HDA4:0.00314)  
0.000:0.00014)0.914:0.00985)1.000:0.17155,(((Bradi3g57240:0.01806,(((Ta\_W5G8F8:0.00015,Tu\_M7ZJ  
W1:0.04643)0.834:0.00212,Ta\_W5GM85:0.00121)0.747:0.00163,Ta\_W5GYS6:0.00331)1.000:0.03450)0.  
991:0.02548,((Sb\_C5XTK8:0.00182,(Zm\_K7U9N8:0.0,Zm\_K7UKR6:0.0):0.01658)1.000:0.02843,(Obr\_J3LH  
M3:0.01270,(((Oba\_A0A0D3HCG3:0.0,Ogl\_A0A0E0B968:0.0,Osj\_Q948A2:0.0):0.00014,((Og\_I1QTJ0:0.0,  
Or\_A0A0E0QXS9:0.0):0.00014,OsI\_B8BGA7:0.00014)0.000:0.00015)0.999:0.01120,(Op\_A0A0E0K5W3:0.  
01712,(Ogl\_A0A0D9YZ60:0.00014,(OsI\_B8AJH3:0.00137,(Oba\_A0A0D3FB61:0.0,Or\_A0A0E0NLN8:0.0,OsJ  
\_Q0DX33:0.0,Osj\_Q6ZGC5:0.0):0.00014)0.785:0.00014)0.777:0.00217)0.863:0.00347)0.720:0.00126)1.0  
00:0.02987)0.053:0.00440)1.000:0.10364,(Amt\_W1PU99:0.09899,((Eg\_A0A059CV39:0.06711,(((Pt\_B9H  
CR4:0.0,Pt\_B9HCR5:0.0):0.04893,Rc\_B9RQX7:0.05234)0.978:0.02169,(Vv\_296081724:0.0,Vv\_73138512  
1:0.0):0.06403)0.771:0.00348)0.226:0.00520,(((Bo\_A0A0D3A2A6:0.00199,(Bn\_A0A078CJT6:0.00144,Br\_  
M4D4M2:0.00278)0.923:0.00649)0.999:0.02837,(Al\_D7M987:0.03068,((Bn\_A0A078IAB0:0.0,Br\_M4F7F  
6:0.0):0.00400,(Bn\_A0A078CBK2:0.00015,Bo\_A0A0D3DHF8:0.00283)0.724:0.00168)0.998:0.03116)0.32  
0:0.01042)1.000:0.11559,((Mt\_G7I929:0.07205,((Gm\_K7M5Y2:0.0,Gm\_K7M5Y3:0.0):0.00014,Gm\_K7M5  
Y4:0.00627)0.994:0.02539)0.966:0.01891,((Mt\_A0A072V3H1:0.0,Mt\_G7J8G4:0.0):0.06598,((Gm\_I1K8H1  
:0.0,Gm\_K7KTA5:0.0):0.00803,((Gm\_I1JU19:0.0,Gm\_K7KIA6:0.0,Gm\_K7KIA7:0.0):0.00015,Gm\_K7KIA8:0.  
00140)0.979:0.01352)0.999:0.02893)0.857:0.01444)1.000:0.03679)0.280:0.00683)0.952:0.02212)0.781:  
0.02020)0.969:0.04547)1.000:0.15043)0.979:0.03173)1.000:0.06092,((Amt\_U5D0E7:0.04021,((((Mt\_A  
0A072VH49:0.05415,((Gm\_K7LGK9:0.0,Gm\_K7LGL0:0.0,Gm\_K7LGL1:0.0):0.01200,Gm\_K7N0J2:0.01244)  
0.984:0.02637)1.000:0.08494,(((Bradi1g00607:0.02036,(Ta\_W5DUD0:0.01588,Ta\_W5FV45:0.01904)0.99  
9:0.03292)0.974:0.02087,((Sb\_C5WRU7:0.01557,(Zm\_A0A096TYW2:0.0,Zm\_A0A096TYW3:0.0):0.00723)  
0.999:0.02662,(Obr\_J3LV12:0.01823,((Op\_A0A0E0K1W6:0.0,Op\_A0A0E0K1W7:0.0):0.00257,(Ogl\_A0A0D  
9ZG61:0.00014,((Oba\_A0A0D3FRP1:0.0,Og\_I1PHM9:0.0,Or\_A0A0E0P479:0.0,Or\_A0A0E0P480:0.0,Osj\_Q  
7Y1D5:0.0):0.00014,(OsI\_B8AP64:0.00014,Osj\_Q0DLJ9:0.02729)0.000:0.00014)0.000:0.00015)0.768:0.0  
0187)0.994:0.01710)0.947:0.01329)0.644:0.00988)0.988:0.03128,(Sb\_C5X4F4:0.02541,((Obr\_J3LDN3:0.  
01841,((Op\_A0A0E0K0W2:0.0,Op\_A0A0E0K0W3:0.0):0.00015,(OsI\_B8AJC5:0.00133,(Oba\_A0A0D3F667:  
0.00014,(Og\_I1P148:0.02969,(Or\_A0A0E0NG65:0.00014,Osj\_Q6YWH9:0.00014)0.832:0.00268)0.926:0.0  
0014)1.000:0.00015)0.982:0.00687)0.987:0.01413)0.988:0.01701,(Bradi3g29700:0.01139,(Ta\_W5AFN3:  
0.00338,(Ta\_W5A527:0.00134,Tu\_M7ZX87:0.00844)0.975:0.00932)0.995:0.01986)0.995:0.02237)0.769:  
0.00955)0.990:0.03852)1.000:0.11551)0.941:0.03269,(SI\_K4CWD4:0.10121,((Al\_D7LFR7:0.01765,((Bn\_A  
0A078CRV4:0.00140,(Bn\_A0A078D6H4:0.00822,Bo\_A0A0D3B4P4:0.00014)0.396:0.00269)1.000:0.03061  
,(Bn\_A0A078FVM3:0.00544,(Bn\_A0A078G459:0.0,Bo\_A0A0D3B5H6:0.0):0.00565)0.996:0.02500)0.911:0  
.00906)1.000:0.04218,(Al\_D7KE56:0.01531,((Bn\_A0A078FRQ7:0.00015,Br\_M4EP56:0.00148)0.904:0.00  
275,(Bo\_A0A0D3DIU8:0.00278,Bn\_A0A078DBI3:0.00279)0.873:0.00011)0.995:0.02298)0.719:0.01810)1.  
000:0.09119)0.674:0.01382)0.743:0.01291,(Eg\_A0A059B3A4:0.06485,(Rc\_B9RWS3:0.07960,Pt\_B9HKX4:  
0.06871)0.835:0.01731)0.960:0.02149)0.964:0.02250,((((Gm\_I1LYR2:0.00711,(Gm\_I1L8I7:0.00012,Gm\_  
K7LHD6:0.00014)0.948:0.00709)0.996:0.02420,(Mt\_G7KZI6:0.05891,(Gm\_I1N9X9:0.00699,Gm\_K7KFL5:  
0.01003)0.475:0.00859)0.971:0.01898)0.999:0.02858,((Pt\_B9GRA7:0.03915,((Eg\_A0A059AWS9:0.0,Eg\_  
A0A059AXE6:0.0):0.05647,Rc\_B9S596:0.01962)0.979:0.01769)0.567:0.00896,Cus\_A0A0A0KF14:0.05986  
)0.430:0.00607)0.750:0.01145,(SI\_K4C3I9:0.04849,(Nb\_116047943|gb|ABJ53197.1|:0.01562,(SI\_K4CU5  
1:0.00014,St\_M1BZQ5:0.00415)0.969:0.01434)0.991:0.02801)0.992:0.02885)0.414:0.00484,(((Al\_D7MN  
J8:0.00976,(((Bn\_A0A078DZX9:0.0,Bo\_A0A0D3D8R7:0.0):0.00276,(Bn\_A0A078G759:0.0,Br\_M4EY14:0.0)  
:0.00278)0.994:0.01645,((Bn\_A0A078JDE8:0.0,Bo\_A0A0D3E6B3:0.0):0.00015,(Bn\_A0A078H652:0.00138  
,Br\_M4EFF0:0.00447)0.702:0.00275)0.542:0.00514)0.958:0.01144)0.991:0.02675,(Al\_D7KDB8:0.02409,(

(Bn\_A0A078H423:0.0,Br\_M4EUP4:0.0):0.00416,(Bn\_A0A078F615:0.00015,Bo\_A0A0D3DZ25:0.00139)0.762:0.00137)0.994:0.02116)0.993:0.02854)1.000:0.06532,((Al\_D7L596:0.04969,((Bn\_A0A078EYT9:0.00607,(Br\_M4F5V4:0.00599,(Bn\_A0A078H538:0.00690,Bo\_A0A0D3D2B8:0.01026)0.482:0.00425)0.776:0.00528)0.995:0.03219,((Bn\_A0A078EMV6:0.00014,Bo\_A0A0D3E3L7:0.00282)0.941:0.00773,(Bn\_A0A078HQ64:0.00014,Br\_M4F6H8:0.00141)0.881:0.00533)0.995:0.02864)0.999:0.05713)1.000:0.11465,(Al\_D7MD92:0.03521,(Bn\_A0A078HBR5:0.00405,((Bn\_A0A078JJP2:0.0,Bo\_A0A0D3A3Q4:0.0):0.00138,Br\_M4D3J9:0.00137)0.863:0.00014)0.992:0.02524)0.999:0.05143)0.992:0.04345)0.996:0.03708)0.942:0.01803)0.928:0.01357,((Obr\_J3LID2:0.00844,((Op\_A0A0E0K6W0:0.0,Op\_A0A0E0K6W1:0.0):0.00289,((Og\_I1P5J6:0.0,Osj\_Q0DWF7:0.0,Osj\_Q6K6A2:0.0):0.00014,((Oba\_A0A0D3FC24:0.0,Or\_A0A0E0NMU1:0.0):0.01206,(Og\_I\_A0A0D9Z050:0.00014,Osj\_B8AEU5:0.01507)0.902:0.00835)0.959:0.01169)0.949:0.00416)0.845:0.00015)0.958:0.01348,(Sb\_C5XVW4:0.01827,(Bradi3g55350:0.01779,(Ta\_W5GAK6:0.00010,(Ta\_W5GJP4:0.00137,(Ta\_W5GUN4:0.00138,Tu\_M8A7Q7:0.02459)0.000:0.00015)0.928:0.00128)1.000:0.02614)0.997:0.02124)0.872:0.00626)1.000:0.08152)0.051:0.01040)1.000:0.07334,(Amt\_W1NDV1:0.04795,(((Nb\_116047945|gb|ABJ53198.1|:0.00622,(Sl\_K4AY46:0.00554,(St\_M1D2P9:0.0,St\_M1D2Q0:0.0,St\_M1D2Q1:0.0,St\_M1D2Q2:0.0):0.00435)0.994:0.02026)1.000:0.05183,((Bradi1g08710:0.00699,(Ta\_W5FRD9:0.00279,(Ta\_W5EXE4:0.00014,Ta\_W5FCE1:0.00138)0.748:0.00139)0.989:0.01643)0.994:0.02012,((Sb\_C5X155:0.00703,Zm\_A0A096TX06:0.00853)0.989:0.01321,(Obr\_J3LST2:0.01030,((Ogl\_A0A0D9ZD42:0.0,Ogl\_A0A0D9ZD43:0.0,Osj\_B8AJV7:0.0,Osj\_Q0DNL1:0.0,Osj\_Q8W312:0.0,Osj\_Q94GQ9:0.0):0.00014,(Og\_I1PFG8:0.00014,(Ogl\_A0A0D9ZD44:0.00145,(Oba\_A0A0D3FP19:0.00014,(Oba\_A0A0D3FP20:0.00014,(Or\_A0A0E0P1A2:0.00154,Op\_A0A0E0KJ00:0.00884)0.000:0.00014)0.519:0.00014)0.496:0.00016)0.867:0.00015)0.000:0.00015)0.887:0.00384)0.984:0.01512)0.538:0.00728)1.000:0.04243)0.072:0.00839,(((Cus\_A0A0A0K9X5:0.03840,(Al\_D7LEA8:0.01803,(Bo\_A0A0D3B4H1:0.00137,(Bn\_A0A078CQI1:0.00280,(Bn\_A0A078D6E8:0.00140,Br\_M4E271:0.00136)0.000:0.00014)0.997:0.00014)0.967:0.01349)1.000:0.06037)0.373:0.01204,(Mt\_G7IQR6:0.03752,(Gm\_I1KTU1:0.00648,(Gm\_I1MJG6:0.0,Gm\_I1MJG7:0.0):0.00611)0.956:0.01663)1.000:0.04062)0.751:0.00611,(Rc\_B9REP0:0.04288,(Pt\_B9HPQ0:0.02392,Pt\_U5GR48:0.02494)0.951:0.01435)0.873:0.00529)0.816:0.00902)0.787:0.01512)1.000:0.10016)0.926:0.02249)1.000:0.04924,(Amt\_W1PFM8:0.04033,(((Eg\_A0A059D272:0.20698,((Mt\_A0A072VLU1:0.02083,(Mt\_A0A072VKN1:0.00015,(Mt\_A0A072VMC2:0.00141,Mt\_A0A072VWV8:0.00138)0.859:0.00137)0.988:0.01554)1.000:0.05901,(Gm\_K7LH82:0.02007,Gm\_K7LZ94:0.01647)0.981:0.02948)1.000:0.09828)0.862:0.01664,((Al\_D7LW08:0.01499,((Bn\_A0A078BVI1:0.0,Br\_M4CGJ1:0.0):0.00025,(Bo\_A0A0D3CUJ1:0.00281,Bn\_A0A078EBV5:0.00014)0.998:0.00116)0.998:0.02251,((Bn\_A0A078EHF7:0.00131,Bo\_A0A0D3BX43:0.00439)0.964:0.00721,(Bn\_A0A078DP45:0.00273,Br\_M4DDL4:0.00438)0.852:0.00276)0.992:0.01688)0.861:0.00842)1.000:0.15782,(Pt\_B9GS42:0.12277,Rc\_B9S4V9:0.08926)0.951:0.02713)0.889:0.01991)0.999:0.06020,(((Obr\_J3MCN8:0.00279,((Oba\_A0A0D3GGU8:0.0,Oba\_A0A0D3GGU9:0.0,Og\_I1Q6K4:0.0,Ogl\_A0A0E0AA18:0.0,Or\_A0A0E0PY32:0.0,Or\_A0A0E0PY33:0.0,Osj\_B8B2G1:0.0,Osj\_Q67VX5:0.0):0.00282,(Op\_A0A0E0LBR3:0.0,Op\_A0A0E0LBR4:0.0):0.00016)0.750:0.00141)0.918:0.00778,((Sb\_C5Z7E0:0.00447,Zm\_K7W4X8:0.00817)0.988:0.01858,(Bradi1g45120:0.00882,(Ta\_W5HJT5:0.00015,Tu\_M7ZHP6:0.00161)1.000:0.03472)0.970:0.01544)0.713:0.00734)1.000:0.06748,((((Bn\_A0A078HV10:0.0,Br\_M4EGQ4:0.0):0.00136,(Bn\_A0A078EOR5:0.00139,Bo\_A0A0D3E5Y1:0.00014)0.927:0.00421)1.000:0.03815,(Al\_D7KIU9:0.01676,((Bn\_A0A078GXFO:0.02187,Br\_M4EPL9:0.03004)0.989:0.02079,((Bn\_A0A078DXD3:0.00014,Br\_M4DQ14:0.00016)0.977:0.00712,(Bn\_A0A078E6S1:0.00472,Bo\_A0A0D3C8K4:0.00307)0.880:0.00297)0.854:0.00303)0.963:0.01098)0.972:0.01302)0.995:0.02903,((Mt\_A0A072U4E6:0.04232,(((Gm\_I1NIS2:0.0,Gm\_K7N528:0.0):0.00302,Gm\_K7LJT2:0.01510)0.958:0.01677,Mt\_G7I6V3:0.09229)0.963:0.01883)0.610:0.01008,Gm\_I1JRQ8:0.05988)0.977:0.02139)0.878:0.01355,((Pt\_B9I5L5:0.02934,Pt\_U5FFY7:0.03120)0.994:0.02742,(Rc\_B9S7I4:0.0



3073,(Cus\_A0A0A0LG65:0.04338,Eg\_A0A059B6M3:0.04147)0.898:0.00819)0.891:0.00735)0.395:0.00709)0.214:0.00910,Sl\_K4D4N5:0.08621)0.958:0.01714)0.392:0.01198,(Sl\_K4C3N3:0.04374,Sl\_K4CAQ1:0.10747)1.000:0.04797)0.520:0.01044)0.954:0.02336)0.981:0.03127)0.433:0.01260)0.956:0.01718,(((Sb\_C5YUJ3:0.03013,((Obr\_J3M989:0.01773,(Op\_A0A0E0L526:0.01034,((Osi\_B8AW95:0.00135,(Or\_A0A0E0PQH6:0.00014,Osj\_Q6L5H7:0.00155)0.888:0.00134)0.974:0.00015,(Oba\_A0A0D3GA85:0.00137,Ogl\_A0A0E0A235:0.00014)0.913:0.00272)0.979:0.01346)0.802:0.00333)0.997:0.02767,(Bradi2g18520:0.02835,(Ta\_W4ZUH2:0.00188,Tu\_M7ZTW6:0.02043)0.997:0.02997)0.995:0.02404)0.234:0.00448)1.000:0.05136,((Zm\_K7V8L8:0.02816,(Zm\_A0A096RU58:0.05193,Zm\_A0A096RU60:0.00015)0.981:0.01542)0.999:0.03786,(Bradi2g48076:0.00753,(Ta\_A0A077S2P4:0.00196,(Ta\_W5DBF8:0.00646,(Ta\_W5CFK2:0.00014,Tu\_M8A1A7:0.00016)0.844:0.00575)0.855:0.01093)0.998:0.02030)0.974:0.01271)0.182:0.00633,(Obr\_J3L3F8:0.00972,(Op\_A0A0E0JN73:0.00806,(((Or\_A0A0E0N1L3:0.0,Or\_A0A0E0N1L4:0.0,Or\_A0A0E0N1L5:0.0,Or\_A0A0E0N1L6:0.0):0.00271,Og\_l1NR90:0.00014)0.664:0.00015,(Osi\_B8A8N5:0.03853,(Ogl\_A0A0D9YE14:0.0,Ogl\_A0A0D9YE15:0.0,Ogl\_A0A0D9YE16:0.0,Ogl\_A0A0D9YE17:0.0,Ogl\_A0A0D9YE18:0.0):0.00135)0.976:0.00015)1.000:0.00010,Oba\_A0A0D3ET95:0.00739)0.933:0.00143)0.834:0.00428)0.979:0.01430)0.952:0.02244)1.000:0.15622,((Sb\_C5XPD8:0.00535,Zm\_A0A096PFT4:0.00783)0.827:0.01096,(((Oba\_A0A0D3FMK2:0.00015,Og\_l1PEH0:0.00014)0.952:0.00014,(Or\_A0A0E0NZQ9:0.0,Or\_A0A0E0NZR0:0.0,Or\_A0A0E0NZR1:0.0,Or\_A0A0E0NZR2:0.0):0.00294)0.911:0.00134,(Ogl\_A0A0D9ZBS3:0.00014,(Osi\_B8APL1:0.00014,(Osj\_Q6AVV2:0.00014,(Op\_A0A0E0KHK1:0.00149,Op\_A0A0E0KHK0:0.00014)1.000:0.00014)0.000:0.00014)0.000:0.00011)0.000:0.00012)0.735:0.00103,Obr\_J3LRN8:0.00314)0.929:0.01338)0.998:0.04937)0.994:0.05642)0.724:0.00861,((Vv\_297743058:0.0,Vv\_731402016:0.0,Vv\_731402018:0.0,Vv\_731402020:0.0):0.03475,(Pt\_U5GWC2:0.03004,(Al\_D7KFH0:0.02890,((Bn\_A0A078G8L7:0.0,Br\_M4EQC2:0.0):0.00160,(Bn\_A0A078D3F0:0.00140,Bo\_A0A0D3DWT0:0.00014)0.778:0.00120)0.985:0.02479)1.000:0.10965)0.752:0.01663)0.970:0.02069)0.888:0.00987)0.911:0.01010);

## SI Appendix, Dataset S4: The phylogenetic tree for MyoB family of myosin receptors

The maximum-likelihood phylogenetic tree of the MyoB family was built using the FastTree program as described in the Materials and Methods section. The multiple alignment used for tree reconstruction contains 526 sequences and 93 informative positions (alignment can be provided by request). The topology of this myosin tree is consistent with MyoB family classification published before (see ref. Peremyslov VV, et al. 2013 in the main text). *Amborella trichopoda* (see Amt\_XXXXXX IDs), a basal member of the flowering plant lineage Magnoliophyta, possesses a single MyoB of each subfamily.

The tree (below) is provided in Newick format, could be open in MEGA or in any other tree visualization software. To open the file copy the text below the dotted line to a text file with “tre” extension, MEGA (or other tree visualization software) should open the file automatically. The original sequence data in fasta format with identifiers corresponding to this tree is provided at the following FTP site in the file **MyoB.fa** and the species abbreviations are explained in the file **Species abbreviations:**

[ftp://ftp.ncbi.nlm.nih.gov/pub/wolf\\_suppl/myosins/](ftp://ftp.ncbi.nlm.nih.gov/pub/wolf_suppl/myosins/)

-----

```
(Vv_731369429:0.02026,Rc_B9SP67:0.04097,((Pt_U5G1X8:0.07093,Pt_B9HJD7:0.00014)0.770:0.01018,(((Gm_K7LDE8:0.0,Gm_K7LDE7:0.0):0.08344,(Gm_K7KQ51:0.00972,(Gm_K7LVS8:0.01963,Gm_I1KRS7:0.00014)0.091:0.00014)0.843:0.03697)0.221:0.01267,(((Sl_K4BNU4:0.0,St_M1CVY3:0.0,St_M1CVY4:0.0):0.02504,(Eg_A0A059BEU2:0.07779,((Al_D7KYE0:0.00014,At1g70750:0.02962)0.951:0.05397,(Bn_A0A078F8Q8:0.00014,(Bn_A0A078E6H2:0.0,Bn_A0A078FB04:0.0,Bo_A0A0D3CZN6:0.0,Br_M4DI63:0.0):0.04476)0.747:0.01467)0.983:0.08992)0.007:0.01745)0.699:0.01593,(Rc_B9SYW0:0.03157,(Pt_B9H3A2:0.01986,Pt_U5FLW3:0.01000)0.864:0.02099)0.756:0.01020)0.847:0.02669)0.656:0.00015,(((Vv_225453201:0.04166,Eg_A0A059AEH1:0.05177)0.323:0.01522,(((Amt_W1P0C1:0.16428,(((Oba_A0A0D3EUN9:0.0,Og_I1NS42:0.0,Ogl_A0A0D9YFP4:0.0,Op_A0A0E0JPE0:0.0,Or_A0A0E0N369:0.0,Osi_B8AA70:0.0,Osj_Q5ZC01:0.0):0.01018,((Sb_C5XLL4:0.01813,Zm_B8A0D5:0.03217)0.915:0.03030,(Bradi2g515101:0.03999,(Ta_A0A077S3R2:0.02497,((Ta_W5DBQ4:0.0,Ta_W5CBU1:0.0):0.00014,(Hv_M0XJ36:0.0,Hv_M0XJ34:0.0):0.0101)0.716:0.00699)0.962:0.06159)0.855:0.02001)0.892:0.02999)0.502:0.01736,Obr_J3L4K8:0.01270)0.994:0.17953,((Bradi1g053102:0.23939,(Hv_F2CZ77:0.03689,Ta_W5FF62:0.02210)0.758:0.04890)0.993:0.24204,(Sb_C5WX46:0.06851,(Obr_J3LTR9:0.06917,((Oba_A0A0D3FQ83:0.0,Og_I1Q5S9:0.0,Ogl_A0A0D9ZEH2:0.0,Or_A0A0E0P2L4:0.0,Osi_A2XMY8:0.0,Osj_Q851Q1:0.0,Osj_Q10C07:0.0):0.01144,Op_A0A0E0KK90:0.01027)0.794:0.03075)0.752:0.02859)0.424:0.04390)0.963:0.12449)0.797:0.04380,((((Hv_M0UVM3:0.0,Hv_M0UVM4:0.0):0.01015,(Ta_W5EFI4:0.02067,((Ta_W5E0D0:0.0,Tu_M7ZM62:0.0):0.00016,Ta_W5E7B3:0.01012)0.000:0.00014)0.970:0.04136)0.909:0.04000,((Obr_J3LKB0:0.02942,((Oba_A0A0D3FE70:0.0,Og_I1P7W5:0.0,Ogl_A0A0D9Z2H1:0.0,Op_A0A0E0K967:0.0,Or_A0A0E0NQ36:0.0,Osj_Q8S5U4:0.0):0.00014,Osi_A2XCW2:0.00984)0.839:0.02041)0.892:0.03281,(Zm_K7VQG3:0.05234,Sb_C5WWW5:0.01370)0.919:0.04745)0.760:0.01154)0.114:0.02728,Bradi1g741351:0.12394)0.944:0.07639,((Sb_C5WM45:0.01401,(Zm_C4IYG8:0.04131,Zm_C0HG96:0.00014)0.481:0.01712)0.985:0.10607,(((Oba_A0A0D3HDN0:0.0,Og_I1QUH2:0.0,Ogl_A0A0E0BAI2:0.0,Ogl_A0A0E0BAI3:0.0,Op_A0A0E0M7N3:0.0,Or_A0A0E0QZ38:0.0,Osi_A2Z793:0.0,Osj_Q7XEN2:0.0):0.00015,Obr_J3N2M7:0.01008)0.940:0.03165,(Bradi3g267101:0.02046,((Ta_W5AF78:0.0,Ta_W5A3R5:0.0):0.00016,(Hv_M0ZAF9:0.00981,Tu_M7ZJL4:0.00014)0.941:0.0199
```

6)0.989:0.05253)0.733:0.00817)0.749:0.02666)0.918:0.06461)0.983:0.11976,(((Mt\_A0A072VKN8:0.072  
16,((Gm\_K7LH77:0.0,Gm\_K7LH79:0.0):0.04155,Gm\_K7LZ91:0.01024)0.914:0.05613)0.998:0.15306,((Rc\_  
B9S4U6:0.08445,((SI\_K4CUN9:0.01009,St\_M1D3U1:0.00951)0.999:0.14977,(Pt\_B9GS50:0.08998,Pt\_U5  
GDH9:0.04962)0.840:0.03780)0.366:0.03494)0.376:0.00014,((Cus\_A0A0A0KHP0:0.13753,Vv\_731394779  
:0.08522)0.829:0.05871,((Bn\_A0A078I887:0.0,Bn\_A0A078FF81:0.0,Bo\_A0A0D3BTD9:0.0,Br\_M4DP57:0.  
0):0.04033,((At2g30690:0.00999,Al\_D7LC78:0.00014)0.927:0.03518,((Bn\_A0A078JQF0:0.0,Bo\_A0A0D3C  
360:0.0):0.01151,(Bn\_A0A078GWT8:0.0,Br\_M4DYR1:0.0):0.02848)0.731:0.01751)0.193:0.01260)0.998:0  
.13354)0.781:0.02347)0.130:0.01539)0.303:0.02848,(((Bo\_A0A0D3DNI5:0.01025,(Bn\_A0A078H0X6:0.0  
1038,(Bn\_A0A078H405:0.0,Br\_M4EPM2:0.0):0.00014)0.000:0.00014)0.914:0.04654,(((Bn\_A0A078E1N3:  
0.0,Bo\_A0A0D3C8L0:0.0):0.00014,(Bn\_A0A078DW96:0.0,Br\_M4DQ08:0.0):0.01033)0.869:0.02083,(At1g  
08800:0.00014,Al\_D7KIV5:0.01026)0.795:0.01376)0.779:0.02408)1.000:0.19242,((Mt\_A0A072U5Z8:0.05  
114,(Gm\_I1JRQ3:0.00014,Gm\_K7N054:0.02147)0.945:0.05057)0.984:0.08601,(((Pt\_B9I5L1:0.02815,Pt\_  
U5FEF8:0.03355)0.900:0.03809,(Rc\_B9S7H8:0.06053,Vv\_731417015:0.06774)0.766:0.02102)0.904:0.03  
339,(Cus\_A0A0A0LG67:0.11374,((St\_M1CMP1:0.0,St\_M1CMN9:0.0):0.02015,SI\_K4B092:0.00016)0.993:  
0.12874)0.580:0.03062)0.168:0.00016)0.749:0.01368)0.659:0.01101,Eg\_A0A059D4Y0:0.04149)0.827:0.  
02751)0.940:0.06366)0.256:0.01905)0.784:0.03467)0.714:0.03176,(Amt\_W1PAV3:0.06085,(Mt\_A0A072  
UQE9:0.18253,((Rc\_B9R908:0.03934,(Mt\_A0A072TG08:0.04475,(Gm\_K7KVV5:0.01029,Gm\_I1JX11:0.01  
973)0.841:0.02971)0.886:0.03861)0.761:0.01379,((((SI\_K4C8J2:0.0,St\_M1D6I9:0.0):0.14610,((SI\_K4DDU  
1:0.0,St\_M1AUX3:0.0,St\_M1AUX2:0.0):0.11705,((St\_M1C9M2:0.0,St\_M1C9M0:0.0):0.00982,SI\_K4BKL2:  
0.00016)0.849:0.02172)0.731:0.02084)0.398:0.02999,((((Bn\_A0A078G9I8:0.0,Bo\_A0A0D3DWJ6:0.0,Br\_  
M4EQI8:0.0):0.00014,Bn\_A0A078D3N7:0.00015)0.969:0.04024,(At1g18990:0.00977,Al\_D7KH89:0.000  
14)0.877:0.01970)0.742:0.01000,Br\_M4EA97:0.00984)0.000:0.00014,(Bn\_A0A078G1S2:0.0,Bn\_A0A078  
GJJ4:0.0,Bo\_A0A0D3CBE0:0.0):0.00014)0.730:0.02094,(((Bn\_A0A078BVF9:0.02011,Br\_M4CHV0:0.00014  
)0.910:0.02003,(Bo\_A0A0D3CWL5:0.00999,Bn\_A0A078DBX2:0.00014)0.000:0.00016)0.952:0.05668,(((B  
n\_A0A078I653:0.0,Bo\_A0A0D3D0Q5:0.0,Br\_M4DHB4:0.0):0.00014,Bn\_A0A078C7S4:0.00980)0.985:0.05  
863,(At1g74830:0.00973,Al\_D7KS55:0.00977)0.764:0.01147)0.381:0.02377)0.959:0.06827)0.936:0.0750  
7)0.801:0.02567,Cus\_A0A0A0LU10:0.02674)0.766:0.01493,((Pt\_B9IEJ0:0.09772,Pt\_B9I334:0.01683)0.95  
8:0.06536,Vv\_225456596:0.09127)0.749:0.01446)0.000:0.00014)0.779:0.02405)0.971:0.10138)0.720:0.  
05361)0.974:0.15819,((Sm\_D8SDS5:0.0,Sm\_D8QXR7:0.0):0.31673,((((((((Bradi3g194102:0.01997,((Hv\_M  
0UEJ2:0.0,Hv\_M0UEI8:0.0,Hv\_M0UEI9:0.0,Ta\_W5FBY8:0.0):0.01003,Ta\_W5G147:0.00014)0.951:0.0565  
0)0.990:0.08476,Obr\_J3MRQ5:0.03426)0.898:0.03044,(((Oba\_A0A0D3GY70:0.0,Ogl\_I1QH17:0.0,Ogl\_A0  
A0E0AT21:0.0,Or\_A0A0E0QGK7:0.0,Osj\_Q6ZAY0:0.0):0.02056,Op\_A0A0E0LT31:0.02019)0.905:0.03053,  
Sb\_C5YJY6:0.03675)0.449:0.01321,(Zm\_C0PKL3:0.0,Zm\_B6TLG8:0.0):0.06003)0.412:0.00014)1.000:0.46  
759,(Amt\_U5DAP9:0.13122,((((((((Eg\_A0A059CSH6:0.0,Eg\_A0A059CRY0:0.0):0.07063,((SI\_K4D736:0.009  
93,St\_M1AJ73:0.00015)0.917:0.04011,(SI\_K4CB62:0.02094,St\_M1AS00:0.01096)0.752:0.01214)0.993:0.  
09640)0.706:0.01110,(((Gm\_K7KK71:0.03123,((Gm\_K7MCH1:0.0,Gm\_K7MCH2:0.0):0.08498,(Gm\_K7LC  
M2:0.0,Gm\_K7LCM0:0.0):0.03836)0.853:0.02670)0.965:0.06339,(Gm\_K7K9S5:0.03392,Mt\_G7JFI7:0.029  
96)0.866:0.02881)0.949:0.08829,Cus\_A0A0A0LW21:0.18403)0.056:0.02422,Vv\_731407814:0.06150)0.7  
54:0.01257)0.099:0.01122,((((Br\_M4CER2:0.0,Br\_M4CER3:0.0):0.00987,At5g57830:0.00989)0.000:0.00  
015,((Bn\_A0A078IMX:0.0,Bo\_A0A0D3EC86:0.0):0.00010,Al\_D7MNMW3:0.02000)0.000:0.00015)0.000:0.0  
0014,(((Bn\_A0A078ENT0:0.0,Bn\_A0A078H5K7:0.0,Bo\_A0A0D3ALC8:0.0):0.00014,Br\_M4DV66:0.00014)0  
.846:0.02961,((Bo\_A0A0D3B2X9:0.00016,Bn\_A0A078FEY7:0.00014)0.789:0.02539,(Br\_M4CRF7:0.00015,  
Bn\_A0A078DN53:0.00014)0.795:0.01526)0.982:0.08193)0.799:0.02305)0.856:0.00991,Bn\_A0A078ILH8:  
0.00015)0.998:0.13427)0.783:0.02083,(Rc\_B9SQY8:0.07752,(Pt\_B9HB49:0.07611,Pt\_B9IMS6:0.01949)0.

880:0.04431)0.866:0.03961)0.821:0.03014,(((Br\_M4FDR2:0.01100,((Bn\_A0A078CJA9:0.0,Bn\_A0A078HB  
C1:0.0):0.00016,Bo\_A0A0D3DVQ4:0.01007)0.766:0.00937)0.909:0.06039,(At2g24140:0.06263,Al\_D7LGS  
1:0.06052)0.882:0.06378)0.961:0.13280,(At4g30830:0.10577,((Br\_M4D422:0.06577,((Bn\_A0A078COM0:  
0.02256,Bo\_A0A0D3A308:0.03137)0.917:0.03158,Bn\_A0A078GSN9:0.02047)0.731:0.00919)0.995:0.119  
99,(Bn\_A0A078FK88:0.02094,(Bo\_A0A0D3DH33:0.01022,Bn\_A0A078C5G1:0.00015)0.768:0.01021)0.72  
7:0.01588)0.451:0.03522)0.894:0.08883)0.999:0.28470)0.587:0.01954,((St\_M1ADJ4:0.0,St\_M1ADJ5:0.0)  
:0.03847,Sl\_K4DC78:0.03885)1.000:0.33172)0.532:0.04522,((Bradi3g368303:0.05776,(Ta\_A0A096UWF5  
:0.0,Ta\_W5HK30:0.0,Tu\_M8AYN2:0.0):0.09850)0.788:0.03238,((Obr\_J3MTE7:0.02660,(Op\_A0A0E0LVC8:  
0.00016,((Or\_A0A0E0QL6:0.0,Os\_j\_Q6Z8S0:0.0):0.00991,(Oba\_A0A0D3H0S1:0.0,Og\_l1QJ19:0.0,Ogl\_A0A  
0E0AVY5:0.0,Osi\_B8BB41:0.0):0.00014)0.861:0.00995)0.612:0.00351)0.994:0.08701,(Sb\_C5YLM8:0.019  
28,Zm\_A0A096TWW1:0.06320)0.990:0.08035)0.715:0.00847)1.000:0.53378)0.786:0.07133)0.851:0.1002  
8)0.941:0.16542,((((Zm\_A0A096RPJ5:0.10678,((Bradi4g157501:0.06941,(Hv\_M0V7X7:0.03733,((Ta\_W5  
DXE4:0.00014,Ta\_W5DL60:0.00015)0.610:0.00628,Tu\_M7YK01:0.56449)0.840:0.04906)0.915:0.05860)0  
.937:0.05726,((Oba\_A0A0D3HNA1:0.0,Og\_l1R144:0.0,Ogl\_A0A0E0BK12:0.0,Or\_A0A0E0RA09:0.0):0.0001  
6,Osi\_B8BL66:0.04209)0.981:0.09448)0.794:0.04236)0.979:0.14960,((Sb\_C5YNR1:0.01029,Zm\_B4F8Y5:0  
.00016)0.975:0.09287,(Ta\_W5A5A7:0.07172,(Op\_A0A0E0MMH7:0.01446,((Or\_A0A0E0RHF4:0.0,Os\_j\_Q2  
QQM7:0.0):0.00014,(Ogl\_A0A0E0BSV6:0.0,Osi\_A2ZKL7:0.0):0.00015)0.882:0.02889)0.952:0.07389)0.76  
0:0.01967)0.859:0.07594)0.899:0.14404,(((Og\_l1PI18:0.0,Ogl\_A0A0D9ZB52:0.0,Op\_A0A0E0KGX1:0.0,Or  
\_A0A0E0NYY1:0.0,Osi\_A2XK55:0.0,Os\_j\_Q7XZ5:0.0):0.04412,(Zm\_A0A096PNQ4:0.02945,(Sb\_C5WR32:0  
.03099,Zm\_B6SX04:0.00015)0.234:0.02255)0.836:0.06704)0.932:0.23463,((Op\_A0A0E0LHF5:0.03943,((  
Og\_l1Q889:0.0,Or\_A0A0E0Q4D1:0.0,Osi\_B8B7P1:0.0,Os\_j\_Q8H538:0.0):0.00014,Ogl\_A0A0E0AG18:0.010  
45)0.858:0.02416)0.932:0.14942,((Hv\_M0V3K9:0.0,Ta\_W5FDT0:0.0):0.03366,(Bradi1g062501:0.03082,(  
Op\_A0A0E0KJY8:0.00016,((Og\_l1PG79:0.0,Ogl\_A0A0D9ZE66:0.0,Or\_A0A0E0P2B1:0.0,Osi\_A2XMR1:0.0,  
Os\_j\_Q84JQ9:0.0):0.01043,(Sb\_C5WY47:0.00014,(Zm\_A0A096SYX1:0.01025,Zm\_A0A096S149:0.01031)0.  
000:0.00014)0.985:0.05385)0.760:0.01020)0.899:0.03229)0.395:0.01518)0.386:0.09558)1.000:0.73848)  
0.872:0.22053)0.956:0.23365,(((Cus\_A0A0A0LB59:0.05029,(((Mt\_A0A072VUM2:0.02914,(Gm\_K7K8Z1:0  
.00014,Gm\_l1L9Q4:0.00965)0.892:0.00015)0.979:0.09150,((Sl\_K4D349:0.0,St\_M1CQ06:0.0,St\_M1CQ07:  
0.0):0.08389,(Sl\_K4D8L1:0.04030,St\_M1AGJ6:0.00014)0.986:0.11149)0.926:0.06425)0.142:0.03172,((Eg  
\_A0A059A2Z1:0.10144,(Pt\_B9H9N9:0.03988,Pt\_B9IIG4:0.00016)0.794:0.02494)0.766:0.01449,(Eg\_A0A0  
59DI02:0.0,Eg\_A0A059DIV7:0.0):0.10183)0.760:0.02340)0.639:0.00902)0.773:0.01081,Rc\_B9SDN9:0.01  
992)0.713:0.00814,((Amt\_W1NE30:0.28030,(((Bn\_A0A078JQ58:0.0,Br\_M4FC68:0.0):0.03960,Bo\_A0A0  
D3AEE1:0.02299)0.896:0.07092,((Bn\_A0A078EK27:0.0,Bo\_A0A0D3CL21:0.0):0.00016,(Bn\_A0A078F609:  
0.0,Br\_M4F159:0.0):0.01922)0.880:0.04552)1.000:0.23216,(((Bn\_A0A078E9Z7:0.0,Bo\_A0A0D3EHA8:0.0)  
:0.01988,(Bn\_A0A078BZIO:0.0,Br\_M4CYA9:0.0):0.00014)0.989:0.07951,(((At3g11850:0.12100,Al\_D7LAS  
3:0.18160)1.000:0.34671,((Bn\_A0A078EZC5:0.0,Br\_M4EIW3:0.0):0.00964,(Bn\_A0A078FP27:0.0,Bo\_A0A  
0D3AHZ3:0.0):0.00999)0.967:0.07207)0.606:0.00016,(At5g06560:0.00980,Al\_D7LZR8:0.02983)0.956:0.0  
4077)0.785:0.01251)0.483:0.01408)0.937:0.06059)0.686:0.01040,((Mt\_A0A072U4M5:0.07438,((Gm\_l1  
NAX5:0.0,Gm\_K7MZD7:0.0):0.01986,Gm\_l1JQC8:0.00014)0.837:0.02209)0.982:0.08832,Vv\_225439321:  
0.03286)0.847:0.02033)0.829:0.02054)0.911:0.07594)0.265:0.01667,((At3g54740:0.03008,Al\_D7LUX1:0.  
00014)0.088:0.01166,((Br\_M4CSA1:0.00014,(Bn\_A0A078CQA5:0.01015,(Bn\_A0A078CEU3:0.00014,Bo\_A  
0A0D3DT32:0.01022)0.922:0.02052)0.000:0.00015)0.895:0.02048,(((Bn\_A0A078CGZ1:0.05168,Br\_M4DE  
73:0.01005)0.870:0.02608,(Bn\_A0A078EP58:0.02695,Bo\_A0A0D3BXY3:0.02049)0.036:0.00014)0.979:0.  
05911,((Bn\_A0A078BTT6:0.0,Br\_M4CG60:0.0):0.01000,((Bn\_A0A078JXP7:0.0,Bo\_A0A0D3CHR7:0.0):0.10  
530,(Bn\_A0A078F2E1:0.01089,Bo\_A0A0D3CTV1:0.00014)0.927:0.03307)0.755:0.01022)0.932:0.03119)0

.750:0.00956)0.761:0.02054)0.988:0.20811)0.935:0.13891)0.992:0.35749,((Amt\_W1NW15:0.12526,((Cus\_A0A0A0L4N9:0.09557,((Eg\_A0A059ATQ9:0.10796,(((SI\_K4DHL1:0.02013,St\_MOZZT7:0.00984)0.998:0.13991,(Al\_D7KE88:0.00014,(At1g04890:0.03074,(Bn\_A0A078FZT2:0.0,Bn\_A0A078DMK7:0.0,Bo\_A0A0D3C7M9:0.0,Br\_M4DFT7:0.0):0.03114)0.033:0.00992)1.000:0.17327)0.000:0.00015,((At4g13630:0.02006,Al\_D7MHD8:0.00015)0.756:0.01800,((Bn\_A0A078EJ22:0.01001,Br\_M4EV92:0.00014)0.649:0.00408,(Bo\_A0A0D3BYY3:0.02005,Bn\_A0A078JTT7:0.00014)0.757:0.01590)0.462:0.02834)0.968:0.07830)0.858:0.03000)0.766:0.01087,((Pt\_B9IJH5:0.06974,Rc\_B9RWI0:0.05047)0.896:0.03829,(Rc\_B9RWI2:0.09841,(Vv\_731390415:0.00014,Vv\_147800067:0.10980)0.992:0.06189)0.263:0.00015)0.791:0.01019)0.716:0.01030)0.759:0.01114,((Rc\_B9S519:0.12494,(Eg\_A0A059A422:0.10374,(((Gm\_K7KDR3:0.0,Gm\_K7KDR4:0.0):0.01519,Gm\_I1MMD3:0.00775)0.945:0.05264,(Mt\_A0A072UHY6:0.07862,Mt\_A0A072UGC2:0.09121)0.446:0.03095)0.983:0.10034)0.689:0.01762)0.845:0.02937,(Cus\_A0A0A0K8C0:0.25375,((At4g13160:0.05107,Al\_D7MVD0:0.00015)0.774:0.01317,((Bn\_A0A078EK65:0.0,Bn\_A0A078IAZ6:0.0,Bo\_A0A0D3BZ26:0.0,Br\_M4EV59:0.0):0.00985,Br\_M4F1E0:0.06318)0.668:0.00733)0.992:0.16096)0.790:0.03820)0.894:0.03472)0.884:0.07427)0.834:0.07045,(((((((Ogl\_A0A0D9ZIV6:0.0,Ogl\_A0A0D9ZIV4:0.0,Ogl\_A0A0D9ZIV5:0.0):0.00015,Ogl\_A0A0D9ZIV3:0.01199)1.000:0.00963,(Op\_A0A0E0KNZ3:0.0,Op\_A0A0E0KNZ1:0.0,Op\_A0A0E0KNZ2:0.0):0.00014)0.890:0.00039,(Oba\_A0A0D3FU29:0.0,Oba\_A0A0D3FU28:0.0,Or\_A0A0E0P776:0.0,Osi\_B8AS86:0.0):0.00014)0.901:0.03284,(Zm\_C0P8H5:0.02503,Sb\_C5WZE5:0.02425)0.930:0.08160)0.542:0.00721,(Bradi5g047701:0.00014,(Ta\_W5BTD2:0.09107,(Ta\_W5B681:0.01042,(Ta\_W5APZ0:0.00014,Hv\_F2DH65:0.03394)0.855:0.01093)0.930:0.00014)0.993:0.11054)0.946:0.11393)0.994:0.34563,(Nm\_JV763923.1:0.25277,Nm\_GBST01089513.1:0.52356)0.973:0.33547)0.293:0.03467,(Amt\_U5CWK8:0.35414,(((SI\_K4B2H8:0.02630,St\_M1AQ21:0.02503)0.992:0.22135,((Rc\_B9RX72:0.18637,Pt\_B9HN81:0.18922)0.912:0.11924,(((Mt\_G7JU33:0.13247,((Gm\_K7L2I3:0.0,Gm\_K7L2I4:0.0):0.01854,Gm\_K7L5A6:0.01222)0.989:0.19398)0.816:0.06932,(Mt\_B0F6S9:0.14970,(Gm\_I1ME16:0.00014,Gm\_K7M1V6:0.03002)0.990:0.15651)0.959:0.12977)0.868:0.07534,Cus\_A0A0A0KYH0:0.47582)0.195:0.02367)0.831:0.05481)0.775:0.05008,((Obr\_J3LYM0:0.05459,((Oba\_A0A0D3FWQ7:0.0,Og\_I1PLZ3:0.0,Op\_A0A0E0KRJ4:0.0,Or\_A0A0E0PA64:0.0,Osi\_A2XUC1:0.0,Osj\_Q6MWD8:0.0):0.00015,Ogl\_A0A0D9ZLS6:0.01154)0.675:0.00500)0.908:0.09317,((Sb\_C5Y9W8:0.04451,Zm\_A8DMN5:0.02581)0.986:0.14516,(((Tu\_M7ZTN3:0.04849,Hv\_MOYXX3:0.19568)0.537:0.00014,Ta\_W5BGV5:0.00014)0.000:0.00014,(Hv\_F2CXJ5:0.0,Hv\_MOZE80:0.0):0.03250)0.885:0.06883)0.727:0.02918)1.000:0.51190,((Bn\_A0A078GLG2:0.0,Br\_M4EAW2:0.0):0.05294,(Bo\_A0A0D3CB61:0.00014,(Bn\_A0A078FXS3:0.02585,(Al\_D7KGC2:0.07978,At1g18265:0.08973)0.921:0.05650)0.816:0.00014)0.646:0.00011)0.987:0.30188)0.480:0.06297)0.842:0.12912)0.992:0.36908)0.830:0.13244)0.854:0.12561)0.793:0.06898,((((Sphfalx0145s00341:0.0,Sphfalx0145s00342:0.0,Sphfalx0145s00343:0.0,Sphfalx0145s00344:0.0):0.02424,(Sphfalx0130s0025:0.00015,Sphfalx0590s0002:0.01630)0.945:0.04852)0.995:0.13353,(Sphfalx0017s0030:0.12914,Sphfalx0099s0064:0.13962)0.656:0.00797)0.979:0.14780,((Sphfalx0145s0033:0.03873,(Sphfalx0099s0063:0.08122,Sphfalx0041s0123:0.06390)0.795:0.02794)0.977:0.12211,((Pp\_A9SIB3:0.01144,Pp\_A9SKP6:0.11995)0.993:0.15406,((Pp\_A9TOC3:0.02092,Pp\_A9RYU4:0.04014)0.835:0.02898,(Pp\_A9RV31:0.02501,Pp\_A9SA43:0.04647)0.954:0.06641)0.839:0.05311)0.857:0.09916)0.152:0.02199)0.000:0.06380,(Sm\_D8XQ3:0.0,Sm\_D8SDU0:0.0):0.29185)0.238:0.03618)0.891:0.07063,(Sm\_D8S189:0.0,Sm\_D8R124:0.0):0.13192)0.702:0.02355)0.992:0.18244)0.525:0.03848)0.624:0.00511,((Mt\_G7K1Q1:0.06650,((Gm\_K7M8F4:0.0,Gm\_K7M8F5:0.0):0.00967,Gm\_K7KAJ6:0.01955)0.843:0.02827)0.935:0.05139,(Amt\_W1NIX3:0.02685,((At5g16720:0.0,Al\_D7M875:0.0):0.04833,((Bn\_A0A078BX93:0.0,Bo\_A0A0D3EEY6:0.0):0.00014,(Bn\_A0A078FR72:0.01006,Br\_M4CWK4:0.00014)0.886:0.01006)0.809:0.02391)0.999:0.16880)0.540:0.02816)0.745:0.01520)0.734:0.01044)0.776:0.01132,(((Sb\_C5WNQ5:0.00972,(Zm\_A0A096SRB9:0.01991,Zm\_A0A096QGB8:0.00016)0.680:0.00014)0.846:0.03202,((Obr\_J3LS23:0.0416

0,((Op\_A0A0E0KI24:0.0,Op\_A0A0E0KI23:0.0):0.02868,(Bradi1g1118710:0.04991,(Hv\_M0V049:0.00994,(Ta\_W5DPC9:0.0,Ta\_W5ED29:0.0,Ta\_W5ENU5:0.0,Tu\_M7ZJ59:0.0):0.00014)0.901:0.03131)0.914:0.04056)0.119:0.00015)0.763:0.00993,((Oba\_A0A0D3FN30:0.0,Oba\_A0A0D3FN29:0.0,Og\_I1PEW3:0.0,Ogl\_A0A0D9ZCA0:0.0):0.00014,(Osi\_B8AQB9:0.01994,(Or\_A0A0E0P0A1:0.0,Or\_A0A0E0P0A0:0.0,Os\_j\_Q53RK9:0.0):0.00014)0.913:0.00978)0.799:0.01101)0.764:0.01729)1.000:0.15780,((Zm\_K7W117:0.02011,Sb\_C5WQS3:0.00014)0.869:0.02019,(((Bradi1g675301:0.00964,(((Ta\_W5EFH3:0.0,Ta\_W5E2J5:0.0):0.00014,(Ta\_W5DYL7:0.0,Tu\_M7ZFL5:0.0):0.00974)0.000:0.00016,((Hv\_M0XAT4:0.00917,Hv\_M0XAT3:0.00014)0.000:0.00029,Ta\_W5EDX8:0.00014)0.999:0.00034)0.983:0.05062)0.863:0.02044,(Or\_A0A0E0NSQ8:0.00967,(Oba\_A0A0D3FGG3:0.00966,(Og\_I1P9P1:0.0,Ogl\_A0A0D9Z4Y4:0.0,Op\_A0A0E0KBI7:0.0,Osi\_A2XER1:0.0,Os\_j\_Q10NT0:0.0):0.00014)0.000:0.00015)0.910:0.01981)0.997:0.00015,(Obr\_J3LM70:0.00014,((Op\_A0A0E0MME8:0.01253,((Hv\_M0XVY6:0.01316,Ta\_A0A077RSE9:0.01246)0.896:0.07121,(Sb\_C5YNP2:0.02568,Zm\_B6UHQ1:0.04329)0.978:0.11589)0.905:0.06818)0.627:0.00333,(Osi\_A2YIZ5:0.01221,(((Oba\_A0A0D3HUH9:0.0,Ogl\_A0A0E0BSS1:0.0,Or\_A0A0E0RHB2:0.0):0.00015,Os\_j\_Q2QQV4:0.01219)0.919:0.01219,Osi\_A2ZKI1:0.02449)0.000:0.00015)0.752:0.02110)1.000:0.69658)0.849:0.00971)0.693:0.02018)0.862:0.03661)0.864:0.03602,Cus\_A0A0A0KRI5:0.03970)0.751:0.01038)0.791:0.01016)0.796:0.01931);

**SI Appendix, Dataset S5: The phylogenetic tree for MadA family of myosin interactors** (schematically shown on the **Figure 6A**).

The maximum-likelihood phylogenetic tree of the MadA family was built using the FastTree program as described in the Materials and Methods section. The multiple alignment used for tree reconstruction contains 162 sequences and 238 informative positions (alignment can be provided by request).

The tree (below) is provided in Newick format, could be open in MEGA or in any other tree visualization software. To open the file copy the text below the dotted line to a text file with “tre” extension, MEGA (or other tree visualization software) should open the file automatically. The original sequence data in fasta format with identifiers corresponding to this tree is provided at the following FTP site in the file **MadA.fa** and the species abbreviations are explained in the file **Species abbreviations**:

[ftp://ftp.ncbi.nlm.nih.gov/pub/wolf/\\_suppl/myosins/](ftp://ftp.ncbi.nlm.nih.gov/pub/wolf/_suppl/myosins/)

-----  
((((((((Hv\_MOXTZ2:0.07866,Ta\_W5B636:0.19238)1.000:0.71278,Tu\_M7YLB5:0.02281)0.836:0.06991,(Ta\_W5BPX9:0.03998,Ta\_W5C957:0.00015)0.599:0.04171)0.959:0.20046,(((Sb\_C5YD86:0.08339,Zm\_B4F8G1:0.33350)0.989:0.13844,(Obr\_J3LW59:0.06396,(Op\_A0A0E0KNA9:0.02075,((Oba\_A0A0D3FTA3:0.0,Og\_l1PJk4:0.0):0.00444,(Ogl\_A0A0D9ZHQ8:0.00442,(Or\_A0A0E0P686:0.0,Os\_j\_Q7X6C4:0.0,Os\_i\_A2XPG5:0.0):0.00014)0.000:0.00014)0.854:0.01663)0.966:0.07211)0.135:0.03156)0.911:0.05921,Bradi5g04057:0.18014)0.693:0.06128)0.996:0.42152,(Amt\_W1NIV0:0.55495,(((St\_M1B646:0.02256,(Sl\_K4C3S8:0.04757,St\_M1B645:0.00016)0.990:0.10520)1.000:0.30074,(Eg\_A0A059AZJ3:0.31580,(((Bo\_A0A0D3B8R1:0.03129,(Bn\_A0A078G033:0.02214,(Bn\_A0A078DUN2:0.00870,Br\_M4C9I3:0.00476)0.931:0.01989)0.181:0.00379)0.954:0.05563,(At4g02800:0.05031,Al\_D7M3C9:0.03515)0.816:0.05115)1.000:0.25531,(Mt\_A0A072U227:0.28383,(Gm\_l1N9H4:0.08112,Gm\_l1JNU2:0.10167)0.981:0.12079)0.683:0.06977)0.907:0.07005)0.473:0.02753)0.821:0.03891,(Pt\_B9GSN9:0.15310,Pt\_B9H882:0.22793)0.980:0.14748)0.835:0.04556,(Cus\_A0A0A0KDW3:0.37391,Rc\_B9S426:0.17147)0.862:0.05291)0.949:0.17956)0.226:0.09942)1.000:0.88904,(Kf\_971519056:1.25603,((Mpu\_C1N764:3.23286,Ms\_C1EFB8:1.68729)0.882:0.91634,((Ot\_A0A096PBY7:2.54590,(Cv\_E1ZJ64:1.84110,(Aup\_A0A087SH94:1.23109,(Hs\_A0A059LI87:2.42966,Cs\_I0Z873:2.83057)0.333:0.73262)0.644:0.32401)0.865:0.52278)0.807:0.32279,(Sm\_D8SML0:0.03298,Sm\_D8SB05:0.00083)0.999:1.04936)0.124:0.06151)0.892:0.29638)0.753:0.08227)0.903:0.13159,(Sm\_D8R9T8:0.85240,((Pp\_A9SY78:0.27712,(Sf\_Sphfalx0065s0046:0.35322,Sf\_Sphfalx0124s0050:0.36624)0.985:0.23592)0.990:0.34063,(Mp\_1026777147:0.20419,(Sm\_D8SQ49:0.04942,Sm\_D8S8U1:0.00014)0.992:0.68032)0.485:0.22482)0.088:0.06092)0.016:0.04979)0.988:0.35314,Sl\_K4CT56:0.47768)0.650:0.03212,((((Bradi4g25917:0.03361,((Hv\_F2DPL2:0.00116,Hv\_M0UZP8:0.00015)0.835:0.06686,(Ta\_W5DUK8:0.02014,(Ta\_W5EBS2:0.00397,Ta\_W5ER74:0.00800)0.750:0.00395)0.870:0.01955)0.998:0.09475)0.990:0.10841,((Obr\_J3NAV8:0.02426,Obr\_J3N5K5:0.01379)0.981:0.04994,((Oba\_A0A0D3HHI4:0.00014,(((Ogl\_A0A0E0BEN5:0.00394,Os\_i\_B8BIS1:0.00398)0.000:0.00014,(Og\_l1R2K6:0.0,Os\_j\_Q2RBA7:0.0):0.00014)0.767:0.00014,Or\_A0A0E0R3G5:0.00014)0.977:0.00013)0.900:0.01482,(Op\_A0A0E0MBT0:0.00799,(((Os\_j\_Q2QYI4:0.00015,(Os\_i\_B8BNY6:0.00014,(Oba\_A0A0D3HQP9:0.00396,Og\_l1R3H9:0.00014)0.000:0.00015)0.909:0.00393)0.000:0.00016,((Op\_A0A0E0MIZ4:0.0,Op\_A0A0E0MIZ3:0.0):0.01668,Or\_A0A0E0RCZ1:0.00014)0.899:0.00015)0.000:0.00014,(Ogl\_A0A0E0BN32:0.0,Ogl\_A0A0E0BN31:0.0,Ogl\_A0A0E0BN30:0.0):0.00014)0.000:0.00015)0.861:0.00922)0.342:0.01601)0.983:0.08825)0.845:0.06921,Sb\_Q84YE8:0.14786)1.000:0.30744,((Bn\_A0A078FCV0:0.77509,Br\_M4CN69:0.33681)0.998:0.73521,(((Bradi2g22060:0.31935,((Hv\_M0YKK7:0.08914,Hv\_M0YKK6:0.00014)0.761:0.02071,(Ta\_W4ZMU4:0.80071,Tu\_M7ZTR1:0.05584)1.000:0.37047)1.0

00:0.20015)0.968:0.13117,(Obr\_J3M880:0.10549,(Op\_A0A0E0L3W9:0.05132,((Og\_I1PWP3:0.0,Oba\_A0A0D3G919:0.0,Ogl\_A0A0E0A0S8:0.0):0.03553,(Or\_A0A0E0PP35:0.00014,Osi\_A2Y5U2:0.00457)0.295:0.00014)0.972:0.04306)0.946:0.06541)0.975:0.10504)0.818:0.03864,(Zm\_A0A096SS41:0.08345,(Sb\_C5YZU9:0.04978,Zm\_K7VW16:0.21437)0.181:0.01245)0.990:0.16937)0.995:0.40263)0.713:0.07109)0.909:0.10757,((Sb\_C5YVS7:0.02597,Zm\_B6TIU7:0.00015)0.995:0.10670,((Bradi2g31230:0.01001,(((Hv\_M0WWK2:0.0,Hv\_M0WWK4:0.0):0.00014,Hv\_M0WWK1:0.00015)1.000:0.00816,Hv\_M0WWK3:0.00016)0.142:0.00056,((Ta\_W5ABL9:0.00014,Ta\_W5AM70:0.00415)0.000:0.00016,(Ta\_W4ZW20:0.00014,Tu\_M7Z2C3:0.00832)0.834:0.00416)0.754:0.00382)0.990:0.04873)0.909:0.02659,(Obr\_J3M5X3:0.02358,(Op\_A0A0E0L0X3:0.00016,((Oba\_A0A0D3G5Y2:0.0,Og\_I1PUB1:0.0):0.00411,(Ogl\_A0A0D9ZXA3:0.0,Or\_A0A0E0PKL6:0.0,Osj\_Q5WMS9:0.0,Osi\_A2Y343:0.0):0.00015)0.856:0.00413)0.735:0.00611)0.958:0.03226)0.843:0.02834)0.982:0.14082)0.920:0.09194)0.366:0.04712,((((Rc\_B9T0P3:0.08255,(Pt\_B9IGX6:0.13578,Pt\_U5G6E2:0.03650)0.952:0.04262)0.925:0.03728,(Eg\_A0A059DE06:0.07397,(Mt\_G7KY89:0.13197,(Gm\_I1N3C4:0.01635,Gm\_I1L6W8:0.03968)0.986:0.10636)1.000:0.20016)0.971:0.07093)0.807:0.02491,((At5g01970:0.01127,Al\_D7M6D4:0.01014)1.000:0.24478,(((Bo\_A0A0D3BIZ9:0.00015,(Bn\_A0A078DNZ9:0.00684,(Br\_M4D2U8:0.00016,Bn\_A0A078J9E9:0.00453)0.946:0.01383)0.828:0.00681)1.000:0.22269,(((Bn\_A0A078EGF7:0.0,Bo\_A0A0D3CEP1:0.0):0.02293,(Bn\_A0A078GNS3:0.00014,Br\_M4EU73:0.00014)0.933:0.02547)0.925:0.03724,(At1g30050:0.01595,Al\_D7KEQ0:0.00853)0.997:0.08928)0.311:0.01712)0.735:0.03939,(Bn\_A0A078E7V2:0.03280,Bo\_A0A0D2ZSI2:0.04971)1.000:0.25377)0.793:0.10354,(Mt\_Q1STQ5:0.26505,(Gm\_I1JJY7:0.19592,Gm\_I1MQQ4:0.18204)0.989:0.24902)0.989:0.23291)0.921:0.07611)0.813:0.05877)0.918:0.05290,Cus\_A0A0A0KXX4:0.23274)0.517:0.02471,(St\_M1DY11:0.33236,(Sl\_K4D1S2:0.00015,((St\_M1CNE2:0.00014,St\_M1CNF6:0.17632)1.000:0.39972,St\_M1CNE3:0.00015)0.685:0.05565)1.000:0.39880)0.593:0.05393)0.964:0.06670,(((Cus\_A0A0A0KD42:0.19829,(Eg\_A0A059DAT4:0.29923,(Pt\_B9INJ6:0.10891,Pt\_B9I780:0.07120)0.977:0.10545)0.387:0.05048)0.925:0.05699,(((Bn\_A0A078GWV3:1.00291,(Br\_M4E206:0.00016,(Bo\_A0A0D3BTG3:0.06898,(Bn\_A0A078D663:0.00014,(Bn\_A0A078GF25:0.0,Bo\_A0A0D3B492:0.0):0.07619)0.318:0.03618)0.475:0.00555)0.103:0.00418)0.991:0.15883,(At2g30530:0.01155,Al\_D7LC61:0.00720)0.968:0.08528)0.666:0.03822,Br\_M4DYP4:0.17283)1.000:0.33109,(Mt\_G7IV74:0.09674,(Gm\_I1MZN0:0.01840,(Gm\_K7LR77:0.04432,Gm\_I1LLZ7:0.00015)0.842:0.01825)0.975:0.06704)0.998:0.15622)0.615:0.02335)0.953:0.06528,Amt\_W1P346:0.22260)0.204:0.02101);



**SI Appendix, Dataset S6: The phylogenetic tree for MadB family of myosin interactors** (schematically shown on the **Figure 6A**).

The maximum-likelihood phylogenetic tree of the MadB family was built using the FastTree program as described in the Materials and Methods section. The multiple alignment used for tree reconstruction contains 148 sequences and 573 informative positions (alignment can be provided by request).

The tree (below) is provided in the Newick format, could be open in MEGA or in any other tree visualization software. To open the file copy the text below the dotted line to a text file with “tre” extension, MEGA (or other tree visualization software) should open the file automatically. The original sequence data in fasta format with identifiers corresponding to this tree is provided at the following FTP site in the file **MadB.fa** and the species abbreviations are explained in the file **Species abbreviations**: [ftp://ftp.ncbi.nlm.nih.gov/pub/wolf/\\_suppl/myosins/](ftp://ftp.ncbi.nlm.nih.gov/pub/wolf/_suppl/myosins/)

-----  
(((Bo\_A0A0D3B235:0.00747,(Bn\_A0A078C3Z8:0.00955,(Br\_M4CQR6:0.02674,Bn\_A0A078ILA9:0.00380)0.903:0.00575)0.884:0.00857)1.000:0.17990,(At5g20360:0.03358,Al\_D7M004:0.05528)0.997:0.12426)1.000:0.53649,(Pt\_U7E182:0.18445,Rc\_B9T243:0.16881)0.965:0.05233,(((((((At2g25290:0.01567,Al\_D7LKM1:0.01249)0.998:0.04744,(((Bn\_A0A078HJ71:0.00822,Bo\_A0A0D3B7H5:0.00924)0.955:0.01496,(Bn\_A0A078D1J2:0.00859,Br\_M4C8M1:0.01758)0.246:0.01738)1.000:0.06082,(Bn\_A0A078FAZ4:0.00166,(Br\_M4CUB1:0.00335,(Bn\_A0A078J4N4:0.00166,Bo\_A0A0D3DVH4:0.00169)0.978:0.00672)0.000:0.00015)0.999:0.03534)0.727:0.01191)0.995:0.05087,((At4g32070:0.02032,Al\_D7MAS3:0.00682)0.993:0.03967,(((Bo\_A0A0D3A2P7:0.00016,Bn\_A0A078BVJ3:0.00906)0.414:0.00383,(Br\_M4D4B6:0.00350,Bn\_A0A078CJG8:0.01587)0.415:0.00145)1.000:0.08190,((Bn\_A0A078C825:0.0,Bo\_A0A0D3DHB3:0.0):0.03070,(Bn\_A0A078FMA7:0.01128,Br\_M4E5B0:0.02175)0.972:0.02664)0.999:0.05349)0.736:0.02731)0.993:0.05761)1.000:0.23424,((Eg\_A0A059CTU4:0.16312,(Rc\_B9RP02:0.07983,(Pt\_U5G8Z2:0.03589,Pt\_B9IL13:0.05916)0.993:0.04023)0.997:0.04363)0.864:0.01479,((Cus\_A0A0A0L0I5:0.12274,(Gm\_I1JUA6:0.18942,(Gm\_K7MN49:0.19944,Mt\_A0A072VDJ0:0.10113)0.995:0.09927)0.983:0.05539)0.997:0.05608,((Sl\_K4C7L9:0.01916,St\_M1CGS2:0.02147)1.000:0.12862,(Sl\_K4CJY1:0.02628,St\_M1B6V5:0.00810)1.000:0.11927)1.000:0.11244)0.129:0.00955)0.050:0.01353)1.000:0.06564,(((Amt\_W1P6V8:0.05648,Amt\_U5DIC5:0.02634)1.000:0.19132,(((((((Sl\_K4B5S9:0.03877,St\_M1BXP4:0.03692)1.000:0.07918,(Sl\_K4B9Z0:0.04885,St\_M1BE42:0.03141)0.997:0.04810)1.000:0.07725,((Mt\_G7JKF9:0.11646,(Gm\_I1MR20:0.02694,Gm\_I1KNI0:0.04998)0.986:0.04624)0.999:0.07576,(Cus\_A0A0A0M0N6:0.14659,(Eg\_A0A0A0LY0:0.15060,(Rc\_B9RXE4:0.12432,(Pt\_U5GJQ5:0.06503,Pt\_B9HZH5:0.04823)0.973:0.03191)0.183:0.01117)0.677:0.01884)0.231:0.01060)0.829:0.01631)0.964:0.05258,((At1g62390:0.00616,Al\_D7KUR1:0.01160)1.000:0.11976,((Bn\_A0A078GZN4:0.02392,Bo\_A0A0D3C9T1:0.01541)0.778:0.03063,(Br\_M4DT84:0.03279,Bn\_A0A078JUP2:0.08548)0.492:0.02448)1.000:0.12559)1.000:0.10606)0.795:0.03406,Mt\_Q2HTI5:0.62365)0.222:0.04991,((Hv\_M0V5W6:0.02889,(Ta\_W5FFA3:0.01334,(Ta\_W5FZX1:0.00466,(Ta\_W5EUD1:0.00014,Tu\_M8ACZ6:0.04816)0.763:0.00347)0.772:0.00357)0.892:0.00791)0.999:0.06313,((Sb\_C5XQT5:0.01536,Zm\_A0A096PY84:0.03658)1.000:0.07805,((Op\_A0A0E0LYM8:0.01510,((Oba\_A0A0D3H3Y3:0.0,Og\_I1QM63:0.0):0.00364,(Ogl\_A0A0E0AZW7:0.00699,(Or\_A0A0E0QN96:0.00521,Osi\_A2YYR3:0.00174)0.000:0.00016)0.805:0.00014)0.941:0.00766)0.941:0.02120,(Obr\_J3KUS8:0.09164,Osj\_Q6K464:0.09277)0.197:0.03935)1.000:0.07168)0.142:0.00761)1.000:0.29462)0.500:0.05858,Amt\_W1PRJ4:0.26414)0.990:0.10735,((Nm\_GBST01087301.1:0.48588,(Kf\_971516181|dbj|GAQ82040.1|:1.24872,((Mpu\_C1N4S1:0.37846,Ms\_C1FH13:0.38212)0.920:0.13712,(Bs\_612386891|ref|XP\_007508967.1|:0.50423,(Ol\_A4RR59:0.19288,Ot\_A0A096P8H7:0.20813)1.

000:0.43989)0.981:0.17875)1.000:0.57354,((Ms\_C1EJB7:0.50546,(Bs\_612386643|ref|XP\_007508842.1|:0.55933,(Ol\_A4RRV0:0.30179,Ot\_A0A090M2T8:0.19248)1.000:0.43743)0.783:0.13230)1.000:0.44344,((Cs\_I0YT06:0.66238,(Aup\_A0A087SBE8:0.29814,Cv\_E1ZLU2:0.27978)1.000:0.56258)0.278:0.13934,(Cr\_A8IBF4:0.57582,Mn\_926771134|ref|XP\_013894041.1|:0.44373)0.882:0.29016)0.939:0.20905)0.482:0.07334)1.000:0.31474)0.906:0.11459)0.876:0.12313,(Mp\_1026776067|gb|OAE34842.1|:0.27263,Sf\_Sphfalx0094s0036:0.22298)0.993:0.14558)0.974:0.12043)1.000:0.45983)0.894:0.05945,(((Sb\_C5X7S2:0.00798,Zm\_A0A096R5J8:0.01876)0.991:0.03216,((Ta\_W5FCM1:0.01964,(Hv\_F2DFW6:0.00229,(Hv\_MOX2I0:0.0014,(Hv\_MOX2I1:0.00014,Ta\_W5FTH1:0.12825)0.554:0.00016)0.905:0.02097)0.795:0.00739)1.000:0.07848,(Obr\_J3N004:0.00791,(Op\_A0A0E0M4D6:0.00689,((Osi\_A2Z3Y3:0.00014,(Ogl\_A0A0E0B6G1:0.00169,(Or\_A0A0E0QUY5:0.00014,Osj\_Q0IZQ4:0.03312)0.000:0.00012)0.000:0.00014)0.779:0.00168,(Oba\_A0A0D3H9X0:0.00014,Og\_l1QR64:0.00693)0.934:0.00513)0.866:0.00342)0.963:0.00998)0.980:0.02155)0.831:0.01376)1.000:0.21019,(((Sb\_C5X7E0:0.03989,Zm\_A0A096TYB1:0.04338)1.000:0.10610,((Hv\_MOV MH1:0.03633,(Tu\_T1MWF2:0.02236,(Ta\_W5EY36:0.00170,(Ta\_W5FRN8:0.00692,Ta\_W5FGG1:0.00864)0.756:0.00169)0.722:0.00129)0.454:0.01810)1.000:0.13023,(Obr\_J3MVN0:0.03098,(Op\_A0A0E0LYE6:0.02588,((Oba\_A0A0D3H3S3:0.0,Og\_l1QM26:0.0,Or\_A0A0E0QN24:0.0,Osi\_A2YYL8:0.0,Osj\_Q6K378:0.0):0.00262,Ogl\_A0A0E0AZP5:0.00599)0.983:0.01916)0.983:0.02496)0.999:0.07763)0.906:0.02761)1.000:0.18558,((Sb\_C5YHV6:0.06563,Zm\_K7TQE3:0.06213)1.000:0.12579,(Op\_A0A0E0LTG4:0.03977,((Oba\_A0A0D3GYN0:0.00015,((Oba\_A0A0D3GYN1:0.0,Og\_l1QH9C:0.0):0.00015,(Ogl\_A0A0E0ATJ0:0.00175,(Osj\_Q69 QX2:0.00014,Or\_A0A0E0QH11:0.00352)0.000:0.00016)0.924:0.00174)0.891:0.00532)0.764:0.00159,(Osi\_A2YTN6:0.00669,(Obr\_J3MRX8:0.25689,Osi\_A2YTN2:0.14256)0.978:0.07628)0.517:0.00223)0.726:0.00865)1.000:0.10564)1.000:0.13574)1.000:0.13471)1.000:0.13478)0.958:0.04407)1.000:0.08044,((Cus\_A0A0A0LYY0:0.19626,((Gm\_l1LZU9:0.03552,Gm\_l1MU15:0.03807)1.000:0.08983,(Gm\_l1L282:0.14870,Mt\_A0A072V8J2:0.10499)0.896:0.03405)1.000:0.10931)0.930:0.02784,(Eg\_A0A059CMB1:0.01996,(Eg\_A0A059CL10:0.05044,Eg\_A0A059CKF9:0.01303)1.000:0.16770)1.000:0.17521)0.575:0.02260)0.629:0.01512,(Sl\_K4CBK9:0.00958,(St\_M1D104:0.00014,St\_M1D103:0.00669)0.977:0.01843)1.000:0.19425)0.683:0.01159);
